# Supplementary material for: Dominant CT Patterns and Immune Responses during the Early Infection Phases of Different SARS-CoV-2 Variants
Source: MDPI journal article supplement (doi:10.3390/v15061304), 2023-05-31
Supplement: s1 [file s1]

Table S1. Clinical feature of unvaccinated patients in Sixth wave (which dominant variant was Omicron)

|                                                   | Omicron BA.1 without<br>vaccine<br>(n=24) |
|---------------------------------------------------|-------------------------------------------|
| Age, years                                        | 56 [45-69]                                |
| Sex; number of male/female                        | 14/10                                     |
| Underlying disease                                |                                           |
| None                                              | 5 (21)                                    |
| Hypertension                                      | 8 (33)                                    |
| Diabetes mellitus                                 | 3 (12)                                    |
| Body mass index (kg/m <sup>2</sup> )              | 24.4 [21-26]                              |
| Initial nasopharyngeal-viral load (log copies/μL) | 3.9 [3.5-4.5]                             |
| RNAemia                                           | 4 (16)                                    |
| Laboratory data                                   |                                           |
| Neutrophil-to-lymphoid ratio                      | 2.6 [1.8-4.6]                             |
| LDH (IU/L)                                        | 186 [170-233]                             |
| CRP (mg/dL)                                       | 0.81 [0.3-1.9]                            |
| D-dimer (ng/mL)                                   | 0.8 [0.6-2.6]                             |
| Respiratory failure (required oxygen therapy)     | 3 (12)                                    |
| Duration of oxygen therapy (days)                 | 2 [1.5-2.5]                               |
| Intermittent positive pressure ventilation        | 0 (0)                                     |
| Nasal high flow                                   | 0 (0)                                     |
| Death within 30-days after onset                  | 0 (0)                                     |

Continuous variables are reported as median [interquartile range (IQR) 25–75]. Categorical variables are reported as number (percentages).

Table S2. Radiological feature of unvaccinated patients in Sixth wave (which dominant variant was Omicron)

|                                      | Omicron BA.1 without<br>vaccine<br>(n=24) |
|--------------------------------------|-------------------------------------------|
| CT-evaluated day from clinical onset | 2.5 [1.8-3.5]                             |
| Absence of abnormal pulmonary lesion | 11 (46)                                   |
| Semi-quantitative CT score           | 2 [0-13]                                  |
| Dominant CT pattern                  |                                           |
| GGOs                                 | 11 (46)                                   |
| OP                                   | 1 (4)                                     |
| others                               | 1 (4)                                     |
| Range of dominant lesion             |                                           |
| extended over segmental area         | 4 (16)                                    |
| within segmental area                | 1 (4)                                     |
| within lobular area                  | 8 (33)                                    |
| Accompanied CT manifestation         |                                           |
| reversed halo shadow                 | 1 (4)                                     |
| curvilinear shadow                   | 3 (12)                                    |
| bronchovascular bundle thickening    | 2 (8)                                     |
| traction bronchial dilation          | 0 (0)                                     |

Continuous variables are reported as median [interquartile range (IQR) 25–75]. Categorical variables are reported as number (percentages).

## Omicron BA. 1 without vaccine

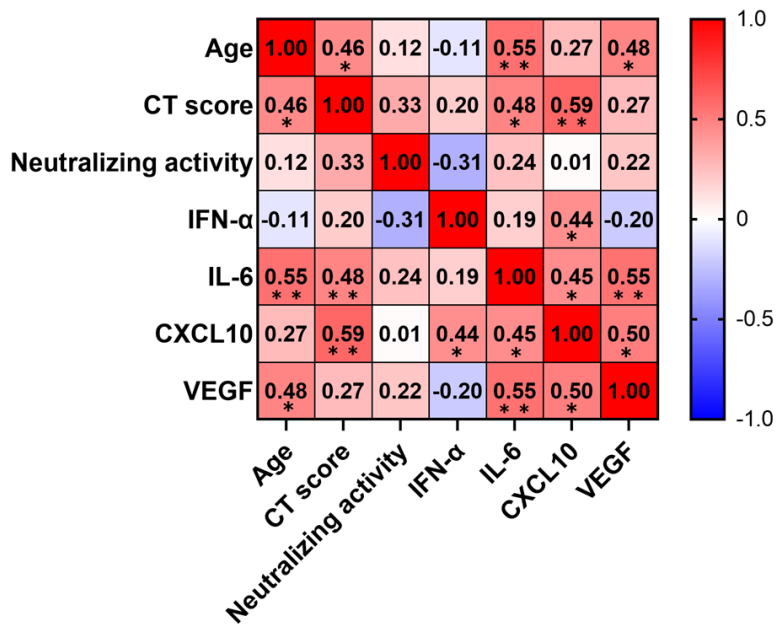

Figure S1. Correlation matrix of biomarkers in unvaccinated participants with the Omicron BA.1 variant. Each level was assessed on admission (within five days after symptom onset). Plot shows the Spearman correlation coefficients. Cells are colored according to the strength and trend of correlations (shades of red = positive correlations, shades of blue = negative correlations). \*  $p < 0.05$ ; \*\*  $p < 0.01$ . CXCL10, C-X-C motif chemokine ligand 10; IFN, interferon; IL, interleukin; VEGF, vascular endothelial growth factor.
